# Supplementary material for: Knowledge, Attitude, and Practice of Physicians Regarding Vaccinations in Yerevan, Armenia: A Case Study of HPV
Source: MDPI journal article supplement (doi:10.3390/vaccines9101188), 2021-10-15
Supplement: s1 [file s1]

HPV is relatively uncommon.: OR (95% CI, p-value)

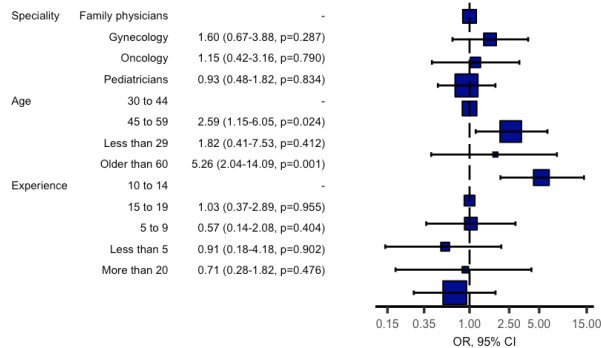

Almost all cervical cancers are caused by HPV: OR (95% CI, p-value)

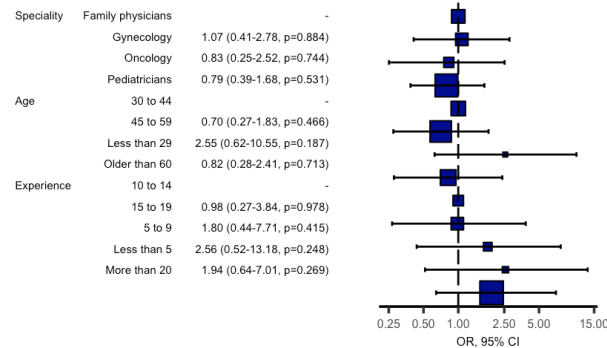

HPV is most common in women in their 30s: OR (95% CI, p-value)

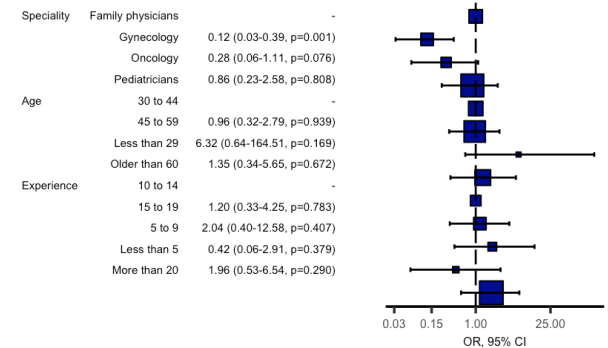

Cervical cancer is one of the most prevalent cancer among woman: OR (95% CI, p-value)

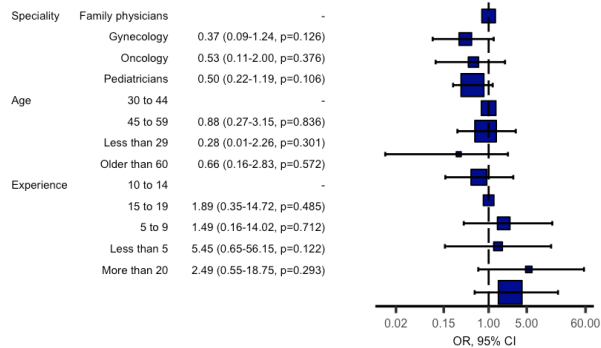

Most people with genital HPV are symptomatic: OR (95% CI, p-value)

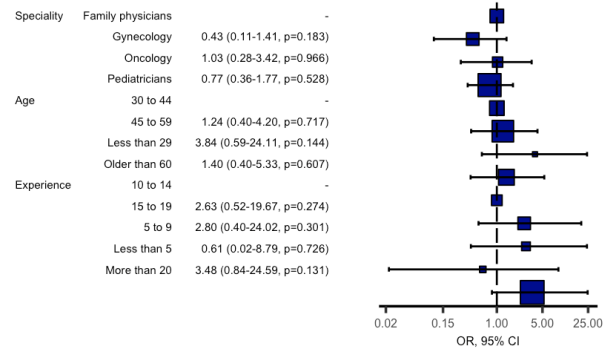

Genital warts are caused by the same HPV types that cause cervical cancer: OR (95% CI, p-value)

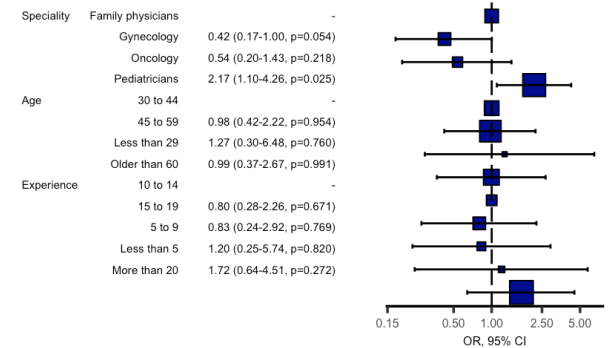

Sexually active adolescent should be tested before HPV vaccination: OR (95% CI, p-value)

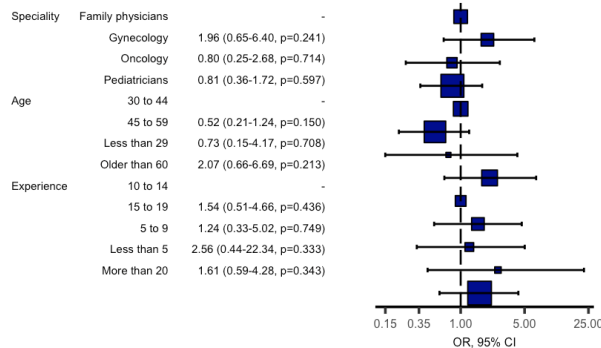

HPV vaccine is available for both males and females: OR (95% CI, p-value)

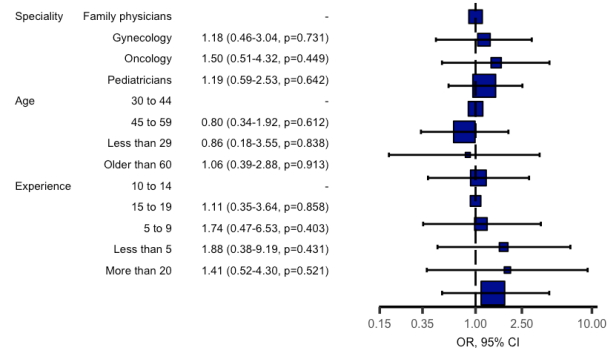

Men and women who have been diagnosed with HPV should not be given HPV vaccine: OR (95% CI, p-value)

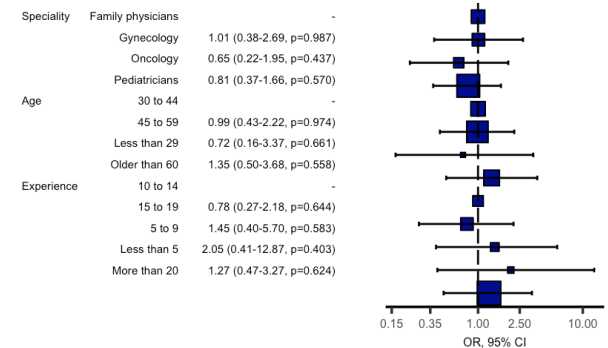

Figure S1: Multivariate logistic regression analysis and forest plot of respondents' awareness of HPV and it's vaccine in Armenia, OR = odd's ratio, CI= confident interval.
